# Supplementary material
Source: PubMed Central journal article supplement (PMC3781973)
Supplement: 2ea0f162d12eb0d2a7ff4ede88f5da15_genetics.113.154674-2.pdf [file 2ea0f162d12eb0d2a7ff4ede88f5da15_genetics.113.154674-2.pdf]

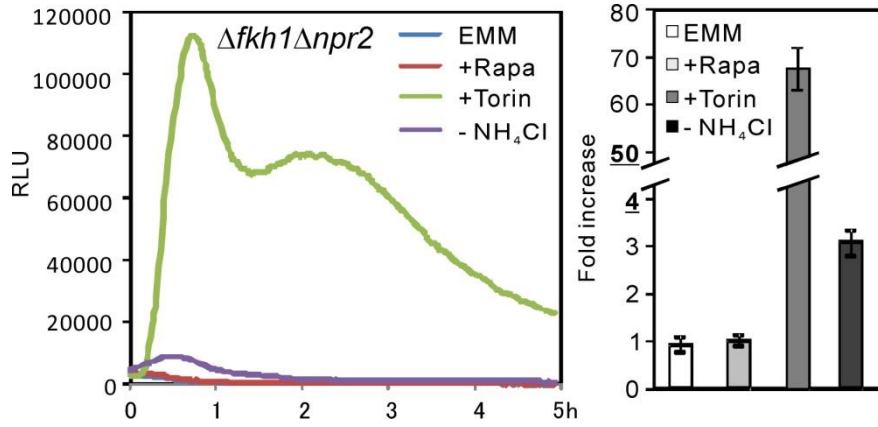

**Figure S2** The *fkh1* deletion abolished rapamycin-induced reporter activity in  $\Delta npr2$  cells. The  $\Delta fkh1\Delta npr2$  cells harboring the reporter vector pKB8527 were grown to exponential phase, and assayed as described in Figure 4A. Standard deviations of ratio are from three independent experiments, and each sample was analyzed in triplicate.
