# Supplementary material
Source: PubMed Central journal article supplement (PMC3781973)
Supplement: 30dfc5c403a2e9f1c80495e3d9b95ad3_genetics.113.154674-5.pdf [file 30dfc5c403a2e9f1c80495e3d9b95ad3_genetics.113.154674-5.pdf]

**Table S1 Fission yeast strains used in this study**

| Strain  | Genotype                                                           | Reference                      |
|---------|--------------------------------------------------------------------|--------------------------------|
| HM123   | <i>h<sup>-</sup> leu1-32</i>                                       | Our stock                      |
| KP456   | <i>h<sup>-</sup> leu1-32 ura4-D18</i>                              | Our stock                      |
| KP928   | <i>h<sup>+</sup> his2 leu1-32 ura4-D18</i>                         | Our stock                      |
| KP207   | <i>h<sup>+</sup> his2 leu1-32</i>                                  | Our stock                      |
| KP91087 | <i>h<sup>+</sup> leu1-32 ade6 ura4-D18 tsc2::KanMX<sub>4</sub></i> | (KIM <i>et al.</i> 2010)       |
| KP90390 | <i>h<sup>+</sup> leu1-32 ade6 ura4-D18 npr2::KanMX<sub>4</sub></i> | (KIM <i>et al.</i> 2010)       |
| KP93006 | <i>h<sup>+</sup> leu1-32 ade6 ura4-D18</i>                         | (KIM <i>et al.</i> 2010)       |
| KP5131  | <i>h<sup>-</sup> leu1-32 tsc2::KanMX<sub>4</sub></i>               | This study                     |
| KP5236  | <i>h<sup>+</sup> leu1-32 npr2::KanMX<sub>4</sub></i>               | This study                     |
| KP5080  | <i>h<sup>-</sup></i>                                               | This study                     |
| KP5128  | <i>h<sup>-</sup> tsc2::KanMX<sub>4</sub></i>                       | This study                     |
| KP5237  | <i>h<sup>-</sup> npr2::KanMX<sub>4</sub></i>                       | This study                     |
| KP5395  | <i>h<sup>-</sup> ura4-D18 tsc2::ura4<sup>+</sup></i>               | (MATSUMOTO <i>et al.</i> 2002) |
| KP5482  | <i>h<sup>-</sup> leu1-32 tor2-287</i>                              | (HAYASHI <i>et al.</i> 2007)   |
| KP5734  | <i>h<sup>+</sup> tor2-287</i>                                      | This study                     |
| KP5637  | <i>h<sup>+</sup> tor2-287 tsc2::KanMX<sub>4</sub></i>              | This study                     |
| KP5579  | <i>h<sup>+</sup> tor2-287 npr2::KanMX<sub>4</sub></i>              | This study                     |
| KP5875  | <i>h<sup>-</sup> tor2<sup>S1837E</sup>::KanMX</i>                  | (NAKASHIMA <i>et al.</i> 2010) |
| KP5873  | JUP1350 <i>h<sup>90</sup> tor2<sup>L1310P</sup>::KanMX</i>         | (URANO <i>et al.</i> 2007)     |
| KP5874  | JUP1352 <i>h<sup>90</sup> tor2<sup>E2221K</sup>::KanMX</i>         | (URANO <i>et al.</i> 2007)     |

|        |                                                                                          |                               |
|--------|------------------------------------------------------------------------------------------|-------------------------------|
| KP5490 | <i>h<sup>+</sup>ura4-D18 tsc2::ura4<sup>+</sup> npr2::KanMX<sub>4</sub></i>              | This study                    |
| KP5750 | <i>h<sup>-</sup> leu1-32 ura4-D18 cat1::ura4<sup>+</sup></i>                             | This study                    |
| KP6029 | <i>h<sup>-</sup> ura4-D18 cat1::ura4<sup>+</sup> tsc2::KanMX<sub>4</sub></i>             | This study                    |
| KP6031 | <i>h<sup>+</sup> ura4-D18 cat1::ura4<sup>+</sup> npr2::KanMX<sub>4</sub></i>             | This study                    |
| KP6033 | <i>h<sup>+</sup> ura4-D18 tor2-287 cat1::ura4<sup>+</sup></i>                            | This study                    |
| KP6034 | <i>h<sup>+</sup> ura4-D18 cat1::ura4<sup>+</sup></i>                                     | This study                    |
| KP2233 | <i>h<sup>+</sup> leu1-32 his2 ura4-D18 fkh1::ura4<sup>+</sup></i>                        | (Sio <i>et al.</i> 2005)      |
| KP5585 | <i>h<sup>-</sup> leu1-32 ura4-D18 fkh1::ura4<sup>+</sup> npr2::KanMX<sub>4</sub></i>     | This study                    |
| KP5855 | <i>h<sup>-</sup> leu1-32 ura4-D18 tsc2::ura4<sup>+</sup> npr2::KanMX<sub>4</sub></i>     | This study                    |
| KP5859 | <i>h<sup>+</sup> ura4-D18 Cat1-GFP:ura4<sup>+</sup></i>                                  | This study                    |
| KP5822 | <i>h<sup>+</sup> ura4-D18 npr2::KanMX<sub>4</sub> Cat1-GFP:ura4<sup>+</sup></i>          | This study                    |
| KP5826 | <i>h<sup>+</sup> ura4-D18 tsc2::KanMX<sub>4</sub> Cat1-GFP:ura4<sup>+</sup></i>          | This study                    |
| KP5955 | <i>h<sup>+</sup> ura4-D18 tor2-287 Cat1-GFP:ura4<sup>+</sup></i>                         | This study                    |
| KP5903 | <i>h<sup>-</sup> gtr1::KanMX<sub>6</sub></i>                                             | (VALBUENA <i>et al.</i> 2012) |
| KP5904 | <i>h<sup>-</sup> ura4-D18 gtr2::ura4<sup>+</sup></i>                                     | (VALBUENA <i>et al.</i> 2012) |
| KP5914 | <i>h<sup>+</sup> ura4-D18 tor2-287</i>                                                   | This study                    |
| KP5968 | <i>h<sup>+</sup> ura4-D18 gtr2::ura4<sup>+</sup> tor2-287</i>                            | This study                    |
| KP5974 | <i>h<sup>+</sup> ura4-D18 gtr2::ura4<sup>+</sup> npr2::KanMX<sub>4</sub></i>             | This study                    |
| KP6385 | <i>h<sup>-</sup> ura4-D18 tor2-287 npr2::KanMX<sub>4</sub> Cat1-GFP:ura4<sup>+</sup></i> | This study                    |
| KP6366 | <i>h<sup>-</sup> npr2::natMX<sub>6</sub></i>                                             | This study                    |
| KP6402 | <i>h<sup>-</sup> npr2::natMX<sub>6</sub> tor2<sup>S1837E</sup>:KanMX</i>                 | This study                    |

- HAYASHI, T., M. HATANAKA, K. NAGAO, Y. NAKASEKO, J. KANO *et al.*, 2007 Rapamycin sensitivity of the *Schizosaccharomyces pombe tor2* mutant and organization of two highly phosphorylated TOR complexes by specific and common subunits. *Genes Cells* **12**: 1357-1370.
- KIM, D. U., J. HAYLES, D. KIM, V. WOOD, H. O. PARK *et al.*, 2010 Analysis of a genome-wide set of gene deletions in the fission yeast *Schizosaccharomyces pombe*. *Nat Biotechnol* **28**: 617-623.
- MATSUMOTO, S., A. BANDYOPADHYAY, D. J. KWIATKOWSKI, U. MAITRA and T. MATSUMOTO, 2002 Role of the Tsc1-Tsc2 complex in signaling and transport across the cell membrane in the fission yeast *Schizosaccharomyces pombe*. *Genetics* **161**: 1053-1063.
- NAKASHIMA, A., T. SATO and F. TAMANOI, 2010 Fission yeast TORC1 regulates phosphorylation of ribosomal S6 proteins in response to nutrients and its activity is inhibited by rapamycin. *J Cell Sci* **123**: 777-786.
- SIO, S. O., T. SUEHIRO, R. SUGIURA, M. TAKEUCHI, H. MUKAI *et al.*, 2005 The role of the regulatory subunit of fission yeast calcineurin for *in vivo* activity and its relevance to FK506 sensitivity. *J Biol Chem* **280**: 12231-12238.
- URANO, J., T. SATO, T. MATSUO, Y. OTSUBO, M. YAMAMOTO *et al.*, 2007 Point mutations in TOR confer Rheb-independent growth in fission yeast and nutrient-independent mammalian TOR signaling in mammalian cells. *Proc Natl Acad Sci U S A* **104**: 3514-3519.
- VALBUENA, N., K. L. GUAN and S. MORENO, 2012 The Vam6 and Gtr1-Gtr2 pathway activates TORC1 in response to amino acids in fission yeast. *J Cell Sci* **125**: 1920-1928.
