# Supplementary material
Source: PubMed Central journal article supplement (PMC3781973)
Supplement: c4f0030da19d585a83a5553ca68b6b45_genetics.113.154674-1.pdf [file c4f0030da19d585a83a5553ca68b6b45_genetics.113.154674-1.pdf]

```

Sp Npr2      MEYSEEGWMDQADSFPRLLAIFFALFDPLGGPIVACEAPAGSVTNVDGGKNCLLPFETI
Hs NPRL2     -----MGSGCRIECIEFFSEFHPTLGPKITYQVPEDFIS-----RELFDTV
              .  * : .***: *. *  ** : : . * . : :                * : * :

Sp Npr2      SDYVIPKRELCNKTITVCTNHYQVIGHPIISIGSNYERNALIFNMCMIFHEEEDSACYIP
Hs NPRL2     QVYIITKPELQNKLITVTAMEKKLIGCPVCI EHKKYSRNALLFNLGFVCDAAKTCALEP
              .  * : * . * ** * * * * : . : ** * : * . * : * : * : * : * : * : *

Sp Npr2      LVKRLARNLEVLKQIHYISDLNKRPIFSVIEQILEDMNNFCECMIQLDDQNSINIKLF
Hs NPRL2     IVKLAGYLTTLEESSFVSMEEKQKLPIMTILLEELNASGRCTLPIDESNTIHLKVI
              : * : * * * . * * : : * : : : : : : : * : * * . * : * : * : * : * :

Sp Npr2      PVFSPPTVKS FHPILT AQLDLLMDKNWDMTVQKVYPFINGINSVQRI AELANVSYRSC
Hs NPRL2     EQRPDPVVAQEYDVPVFTKDKEDFFNSQWDLTTQQILPYIDGFRHIQKISAEADVELNLV
              * . * . . : . * : * * : : : : : * : * . * : * : * : * : * : * .

Sp Npr2      QKCMHFLLYYGCLIIADIFGFHNIYAMTTNAPNLLQDPDFQRECTAYVSTNSSNAKNVTF
Hs NPRL2     RIAIQNLLYYGVVTLVSI LQSNVYCPKQVQDLVDDKSLGEACLSYVTKQG—HKRASL
              : . : : : * * * * : : . * : * * * . * . : : * : * . * * * : : . * : :

Sp Npr2      ATIFKLYCSLRQGLRVKDWNNENKEIFKGLDVRRLISFGTIKGLIYRVHKYPYLERRTMR
Hs NPRL2     RDVFQLYCSLSPGTTVRDLIGRHPQQLQHVDERKLIQFGLMKNLIRRLQKYPVRVTR—
              : * : * * * * * * * * . * . : : : : * * * * * * * * * * * * * * *

Sp Npr2      NNLTEEEKLLGLLDGKHDFDEL CVTLKKS PKV V NEM IAGLGDACFIYV
Hs NPRL2     —EEQSHPARLYTGCHSYDEICCKTGMSYHELDERLENDPNI IICWK
              * : . : . * * * * * : * . * : * : : . : : :

```

**Figure S1** Alignment of protein sequences of *Schizosaccharomyces pombe* (Sp) Npr2 with related proteins from humans (Hs) NPRL2. Sequence alignment was performed using the CLUSTALW program. Asterisks indicate identical amino acids, colons indicate strictly conserved amino acids and dots indicate conserved amino acids.

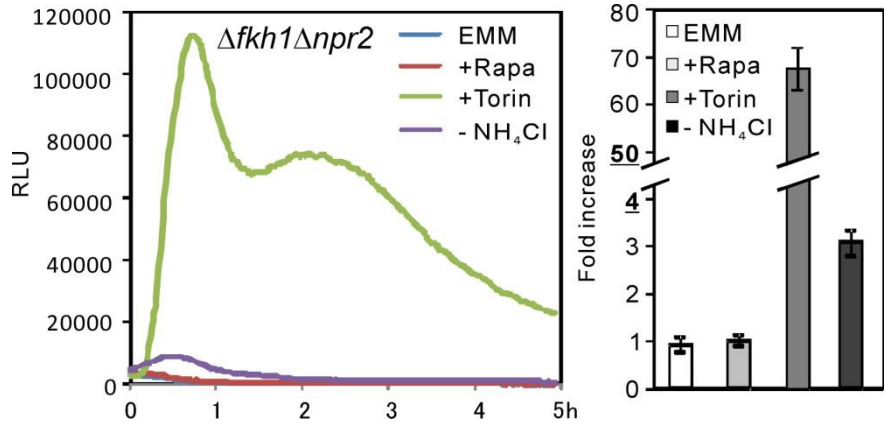

**Figure S2** The *fkh1* deletion abolished rapamycin-induced reporter activity in  $\Delta npr2$  cells. The  $\Delta fkh1\Delta npr2$  cells harboring the reporter vector pKB8527 were grown to exponential phase, and assayed as described in Figure 4A. Standard deviations of ratio are from three independent experiments, and each sample was analyzed in triplicate.

**Table S1 Fission yeast strains used in this study**

| Strain  | Genotype                                                           | Reference                      |
|---------|--------------------------------------------------------------------|--------------------------------|
| HM123   | <i>h<sup>-</sup> leu1-32</i>                                       | Our stock                      |
| KP456   | <i>h<sup>-</sup> leu1-32 ura4-D18</i>                              | Our stock                      |
| KP928   | <i>h<sup>+</sup> his2 leu1-32 ura4-D18</i>                         | Our stock                      |
| KP207   | <i>h<sup>+</sup> his2 leu1-32</i>                                  | Our stock                      |
| KP91087 | <i>h<sup>+</sup> leu1-32 ade6 ura4-D18 tsc2::KanMX<sub>4</sub></i> | (KIM <i>et al.</i> 2010)       |
| KP90390 | <i>h<sup>+</sup> leu1-32 ade6 ura4-D18 npr2::KanMX<sub>4</sub></i> | (KIM <i>et al.</i> 2010)       |
| KP93006 | <i>h<sup>+</sup> leu1-32 ade6 ura4-D18</i>                         | (KIM <i>et al.</i> 2010)       |
| KP5131  | <i>h<sup>-</sup> leu1-32 tsc2::KanMX<sub>4</sub></i>               | This study                     |
| KP5236  | <i>h<sup>+</sup> leu1-32 npr2::KanMX<sub>4</sub></i>               | This study                     |
| KP5080  | <i>h<sup>-</sup></i>                                               | This study                     |
| KP5128  | <i>h<sup>-</sup> tsc2::KanMX<sub>4</sub></i>                       | This study                     |
| KP5237  | <i>h<sup>-</sup> npr2::KanMX<sub>4</sub></i>                       | This study                     |
| KP5395  | <i>h<sup>-</sup> ura4-D18 tsc2::ura4<sup>+</sup></i>               | (MATSUMOTO <i>et al.</i> 2002) |
| KP5482  | <i>h<sup>-</sup> leu1-32 tor2-287</i>                              | (HAYASHI <i>et al.</i> 2007)   |
| KP5734  | <i>h<sup>+</sup> tor2-287</i>                                      | This study                     |
| KP5637  | <i>h<sup>+</sup> tor2-287 tsc2::KanMX<sub>4</sub></i>              | This study                     |
| KP5579  | <i>h<sup>+</sup> tor2-287 npr2::KanMX<sub>4</sub></i>              | This study                     |
| KP5875  | <i>h<sup>-</sup> tor2<sup>S1837E</sup>::KanMX</i>                  | (NAKASHIMA <i>et al.</i> 2010) |
| KP5873  | JUP1350 <i>h<sup>90</sup> tor2<sup>L1310P</sup>::KanMX</i>         | (URANO <i>et al.</i> 2007)     |
| KP5874  | JUP1352 <i>h<sup>90</sup> tor2<sup>E2221K</sup>::KanMX</i>         | (URANO <i>et al.</i> 2007)     |

|        |                                                                                          |                               |
|--------|------------------------------------------------------------------------------------------|-------------------------------|
| KP5490 | <i>h<sup>+</sup>ura4-D18 tsc2::ura4<sup>+</sup> npr2::KanMX<sub>4</sub></i>              | This study                    |
| KP5750 | <i>h<sup>-</sup> leu1-32 ura4-D18 cat1::ura4<sup>+</sup></i>                             | This study                    |
| KP6029 | <i>h<sup>-</sup> ura4-D18 cat1::ura4<sup>+</sup> tsc2::KanMX<sub>4</sub></i>             | This study                    |
| KP6031 | <i>h<sup>+</sup> ura4-D18 cat1::ura4<sup>+</sup> npr2::KanMX<sub>4</sub></i>             | This study                    |
| KP6033 | <i>h<sup>+</sup> ura4-D18 tor2-287 cat1::ura4<sup>+</sup></i>                            | This study                    |
| KP6034 | <i>h<sup>+</sup> ura4-D18 cat1::ura4<sup>+</sup></i>                                     | This study                    |
| KP2233 | <i>h<sup>+</sup> leu1-32 his2 ura4-D18 fkh1::ura4<sup>+</sup></i>                        | (Sio <i>et al.</i> 2005)      |
| KP5585 | <i>h<sup>-</sup> leu1-32 ura4-D18 fkh1::ura4<sup>+</sup> npr2::KanMX<sub>4</sub></i>     | This study                    |
| KP5855 | <i>h<sup>-</sup> leu1-32 ura4-D18 tsc2::ura4<sup>+</sup> npr2::KanMX<sub>4</sub></i>     | This study                    |
| KP5859 | <i>h<sup>+</sup> ura4-D18 Cat1-GFP:ura4<sup>+</sup></i>                                  | This study                    |
| KP5822 | <i>h<sup>+</sup> ura4-D18 npr2::KanMX<sub>4</sub> Cat1-GFP:ura4<sup>+</sup></i>          | This study                    |
| KP5826 | <i>h<sup>+</sup> ura4-D18 tsc2::KanMX<sub>4</sub> Cat1-GFP:ura4<sup>+</sup></i>          | This study                    |
| KP5955 | <i>h<sup>+</sup> ura4-D18 tor2-287 Cat1-GFP:ura4<sup>+</sup></i>                         | This study                    |
| KP5903 | <i>h<sup>-</sup> gtr1::KanMX<sub>6</sub></i>                                             | (VALBUENA <i>et al.</i> 2012) |
| KP5904 | <i>h<sup>-</sup> ura4-D18 gtr2::ura4<sup>+</sup></i>                                     | (VALBUENA <i>et al.</i> 2012) |
| KP5914 | <i>h<sup>+</sup> ura4-D18 tor2-287</i>                                                   | This study                    |
| KP5968 | <i>h<sup>+</sup> ura4-D18 gtr2::ura4<sup>+</sup> tor2-287</i>                            | This study                    |
| KP5974 | <i>h<sup>+</sup> ura4-D18 gtr2::ura4<sup>+</sup> npr2::KanMX<sub>4</sub></i>             | This study                    |
| KP6385 | <i>h<sup>-</sup> ura4-D18 tor2-287 npr2::KanMX<sub>4</sub> Cat1-GFP:ura4<sup>+</sup></i> | This study                    |
| KP6366 | <i>h<sup>-</sup> npr2::natMX<sub>6</sub></i>                                             | This study                    |
| KP6402 | <i>h<sup>-</sup> npr2::natMX<sub>6</sub> tor2<sup>S1837E</sup>:KanMX</i>                 | This study                    |

- HAYASHI, T., M. HATANAKA, K. NAGAO, Y. NAKASEKO, J. KANO *et al.*, 2007 Rapamycin sensitivity of the *Schizosaccharomyces pombe tor2* mutant and organization of two highly phosphorylated TOR complexes by specific and common subunits. *Genes Cells* **12**: 1357-1370.
- KIM, D. U., J. HAYLES, D. KIM, V. WOOD, H. O. PARK *et al.*, 2010 Analysis of a genome-wide set of gene deletions in the fission yeast *Schizosaccharomyces pombe*. *Nat Biotechnol* **28**: 617-623.
- MATSUMOTO, S., A. BANDYOPADHYAY, D. J. KWIATKOWSKI, U. MAITRA and T. MATSUMOTO, 2002 Role of the Tsc1-Tsc2 complex in signaling and transport across the cell membrane in the fission yeast *Schizosaccharomyces pombe*. *Genetics* **161**: 1053-1063.
- NAKASHIMA, A., T. SATO and F. TAMANOI, 2010 Fission yeast TORC1 regulates phosphorylation of ribosomal S6 proteins in response to nutrients and its activity is inhibited by rapamycin. *J Cell Sci* **123**: 777-786.
- SIO, S. O., T. SUEHIRO, R. SUGIURA, M. TAKEUCHI, H. MUKAI *et al.*, 2005 The role of the regulatory subunit of fission yeast calcineurin for *in vivo* activity and its relevance to FK506 sensitivity. *J Biol Chem* **280**: 12231-12238.
- URANO, J., T. SATO, T. MATSUO, Y. OTSUBO, M. YAMAMOTO *et al.*, 2007 Point mutations in TOR confer Rheb-independent growth in fission yeast and nutrient-independent mammalian TOR signaling in mammalian cells. *Proc Natl Acad Sci U S A* **104**: 3514-3519.
- VALBUENA, N., K. L. GUAN and S. MORENO, 2012 The Vam6 and Gtr1-Gtr2 pathway activates TORC1 in response to amino acids in fission yeast. *J Cell Sci* **125**: 1920-1928.

**Table S2 Binding of Npr2 with components of the SEA complex in fission yeast**

| Budding yeast gene | Homolog in fission yeast     | Product                                              | Binding with Npr2 |
|--------------------|------------------------------|------------------------------------------------------|-------------------|
| <i>SEH1</i>        | SPAC15F9.02                  | nucleoporin Seh1                                     | ND                |
| <i>SEA1/IML1</i>   | SPBC26H8.04c                 | DEP domain protein, human ortholog<br>DEPDC5         | +                 |
| <i>SEA2</i>        | SPAC4F8.11                   | WD repeat protein, human family<br>WDR24             | +                 |
| <i>SEA3</i>        | SPAC11E3.05                  | ubiquitin-protein ligase E3, human ortholog<br>WDR59 | +                 |
| <i>SEA4</i>        | SPAC12G12.01c/<br>SPAC630.02 | ubiquitin-protein ligase E3                          | +                 |
| <i>NPR3</i>        | SPBC543.04/Npr3              | Npr2/3 complex subunit Npr3                          | +                 |

ND indicates not determined.

+ indicates the binding with Npr2 was demonstrated based on the *S. pombe* predicted protein interaction database ([www.bahlerlab.info/PInt](http://www.bahlerlab.info/PInt)).
