# Supplementary material
Source: PubMed Central journal article supplement (PMC3781973)
Supplement: c7e0f29e1e19768e567a896a12b9cfaa_genetics.113.154674-4.pdf [file c7e0f29e1e19768e567a896a12b9cfaa_genetics.113.154674-4.pdf]

```

Sp Npr2      MEYSEEGWMDQADSFPRLLAIFALFDPLQGPVIVACEAPAGSVTNVDGGKNCLLPFETI
Hs NPRL2     -----MGSGCRIECIEFFSEFHPTLGPKITYQVPEDFIS-----RELFDTV
              .  * : .***: *. * ** : : . * . : :          * : * :

Sp Npr2      SDYVIPKRELCNKTITVCTNHYQVIGHPIISIGSNYERNALIFNMCMIFHEEEDSACYIP
Hs NPRL2     QVYIITKPELQNKLITVTAMEKKLIGCPVCI EHKKYSRNALLFNLGFVCDAAKTCALEP
              . * : * * ** ** ** : . : ** * : * . * : * : * : * : * : *

Sp Npr2      LVKRLARNLEVLKQIHYISDLNKRPIFSVIEQILEDMNNFCECMIQLDDQNSINIKLF
Hs NPRL2     IVKLAGYLTTLEESSFVSMEEKQKLPIMTILLEELNASGRCTLPIDESNTIHLKVI
              : * : * * * . * * : : * : : : : : : : * : * * . * : * : * : * : :

Sp Npr2      PVFSPPTVKSFHVPILTAQLDLLMDKNWDMTVQKVYPFINGINSVQRI AELANVSYRSC
Hs NPRL2     EQRPDPVVAQEYDVPVFTKDKEDFFNSQWDLTTQQILPYIDGFRHIQKISAEADVELNLV
              * . * . . : . * : * : : : : : * : * : * : * : * : * : * : * .

Sp Npr2      QKCMHFLLYYGCLIIADIFGFHNIYAMTTNAPNLLQDPDFQRECTAYVSTNSSNAKNVTF
Hs NPRL2     RIAIQNLLYYGVVTLVSI LQSNVYCPKQVQDLVDDKSLGEACLSYVTKQG—HKRASL
              : . : : : * : * : : . . * : * : * : * . : . * : * : * : * : * : * : :

Sp Npr2      ATIFKLYCSLRQGLRVKDWNNENKEIFKGLDVRRLISFGTIKGLIYRVHKYPYLERRTMR
Hs NPRL2     RDVFQLYCSLSPGTTVRDLIGRHPQQLQHVDERKLIQFGLMKNLIRRLQKYPVRVTR—
              : * : * : * * * * * * * * : : : : * * : * * * * * * * * * * * *

Sp Npr2      NNLTEEEKLLGLLDGKHDFDEL CVTLKSPKVVNEM IAGLDACFIYV
Hs NPRL2     —EEQSHPARLYTGCHSYDEICCKTGMSYHELDERLENDPNI IICWK
              * : . : * * * * * : * : * : * : : : : :

```

**Figure S1** Alignment of protein sequences of *Schizosaccharomyces pombe* (Sp) Npr2 with related proteins from humans (Hs) NPRL2. Sequence alignment was performed using the CLUSTALW program. Asterisks indicate identical amino acids, colons indicate strictly conserved amino acids and dots indicate conserved amino acids.
