# Supplementary material
Source: PubMed Central journal article supplement (PMC3781973)
Supplement: d236109b5bc2b307715780aab7990db8_genetics.113.154674-3.pdf [file d236109b5bc2b307715780aab7990db8_genetics.113.154674-3.pdf]

**Table S2 Binding of Npr2 with components of the SEA complex in fission yeast**

| Budding yeast gene | Homolog in fission yeast     | Product                                     | Binding with Npr2 |
|--------------------|------------------------------|---------------------------------------------|-------------------|
| <i>SEH1</i>        | SPAC15F9.02                  | nucleoporin Seh1                            | ND                |
| <i>SEA1/IML1</i>   | SPBC26H8.04c                 | DEP domain protein, human ortholog          | +                 |
| <i>SEA2</i>        | SPAC4F8.11                   | WD repeat protein, human family             | +                 |
| <i>SEA3</i>        | SPAC11E3.05                  | ubiquitin-protein ligase E3, human ortholog | +                 |
| <i>SEA4</i>        | SPAC12G12.01c/<br>SPAC630.02 | ubiquitin-protein ligase E3                 | +                 |
| <i>NPR3</i>        | SPBC543.04/Npr3              | Npr2/3 complex subunit Npr3                 | +                 |

ND indicates not determined.

+ indicates the binding with Npr2 was demonstrated based on the *S. pombe* predicted protein interaction database ([www.bahlerlab.info/PInt](http://www.bahlerlab.info/PInt)).
